# Supplementary material
Source: PubMed Central journal article supplement (PMC8995138)
Supplement: NIHMS1789089-supplement-2.pdf [file NIHMS1789089-supplement-2.pdf]

## ■ ASSOCIATED CONTENT

### 📄 Supporting Information

The Supporting Information is available free of charge at <https://pubs.acs.org/doi/10.1021/acsbiomaterials.9b00861>.

SEM images of cross-linked scaffolds, FTIR graphs for as-spun, cross-linked, and degraded scaffolds, SEM and optical images of the scaffolds before and after collagenase degradation assay, quantification of HDF cell orientation and penetration, Live/Dead staining of HDFs on the scaffolds, trichrome staining of the Gel80–PU20 scaffold seeded with HDF in vitro, SEM image of the Gel80–PU20 scaffold seeded with HDF in vitro, H&E staining of acellular scaffolds after implantation on mice for 20 days, % degradation measurement in vivo, F4/80 immunostaining for macrophages on the scaffolds after 20 days on the mice wound, IHC for macrophages (F4/80 + cells) on the scaffolds after 20 days on the mice wound, IHC for myofibroblasts ( $\alpha$ SMA<sup>+</sup> cells) on the wounds with and without Gel80–PU20, and trichrome staining of mice wounds closed in the presence of scaffolds after 14 days ([PDF](#))
