# Supplementary material
Source: PubMed Central journal article supplement (PMC8995138)
Supplement: NIHMS1789089-supplement-Supporting_Information.pdf [file NIHMS1789089-supplement-Supporting_Information.pdf]

# Supporting Information *for*

## Electrospun Polyurethane-Gelatin Composite: A New Tissue Engineered Scaffold for Application in Skin Regeneration and Repair of Complex Wounds

*Mohammadali Sheikholeslam, Meghan E. E. Wright, Nan Cheng, Hwan Hee Oh, Yanran Wang, Andrea K. Datu, J. Paul Santerre\**  
*, Saeid Amini-Nik\*, Marc G. Jeschke\**

corresponding authors:

Email: [marc.jeschke@sunnybrook.ca](mailto:marc.jeschke@sunnybrook.ca) (Marc G. Jeschke)

Email: [said.amininik@utoronto.ca](mailto:said.amininik@utoronto.ca) (Saeid Amini-Nik)

Email: [paul.santerre@dentistry.utoronto.ca](mailto:paul.santerre@dentistry.utoronto.ca) (J. Paul Santerre)

Including 13 figures from S1 to S13

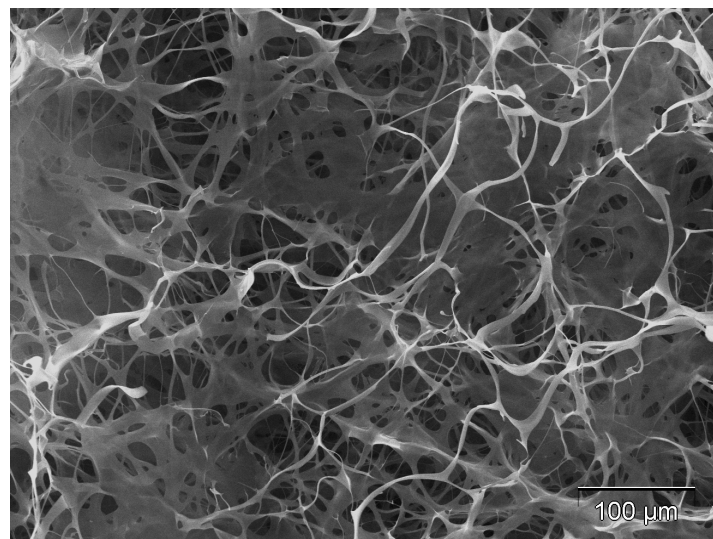

crosslinked Gel100

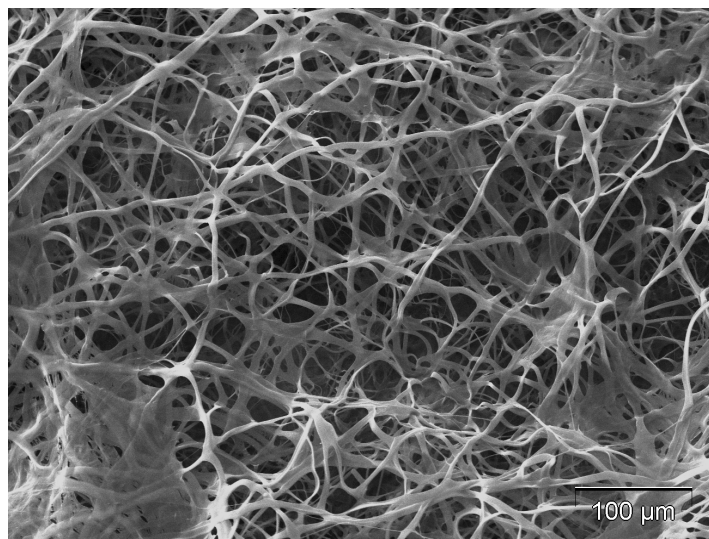

crosslinked Gel80-PU20

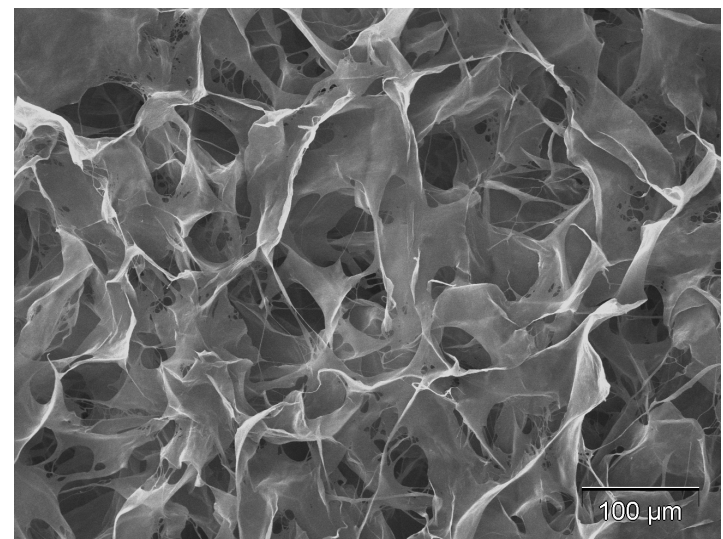

DRM

**S1:** SEM image of dried: crosslinked Gel100, crosslinked Gel80-PU20 and DRM. Scale bar: 100  $\mu\text{m}$

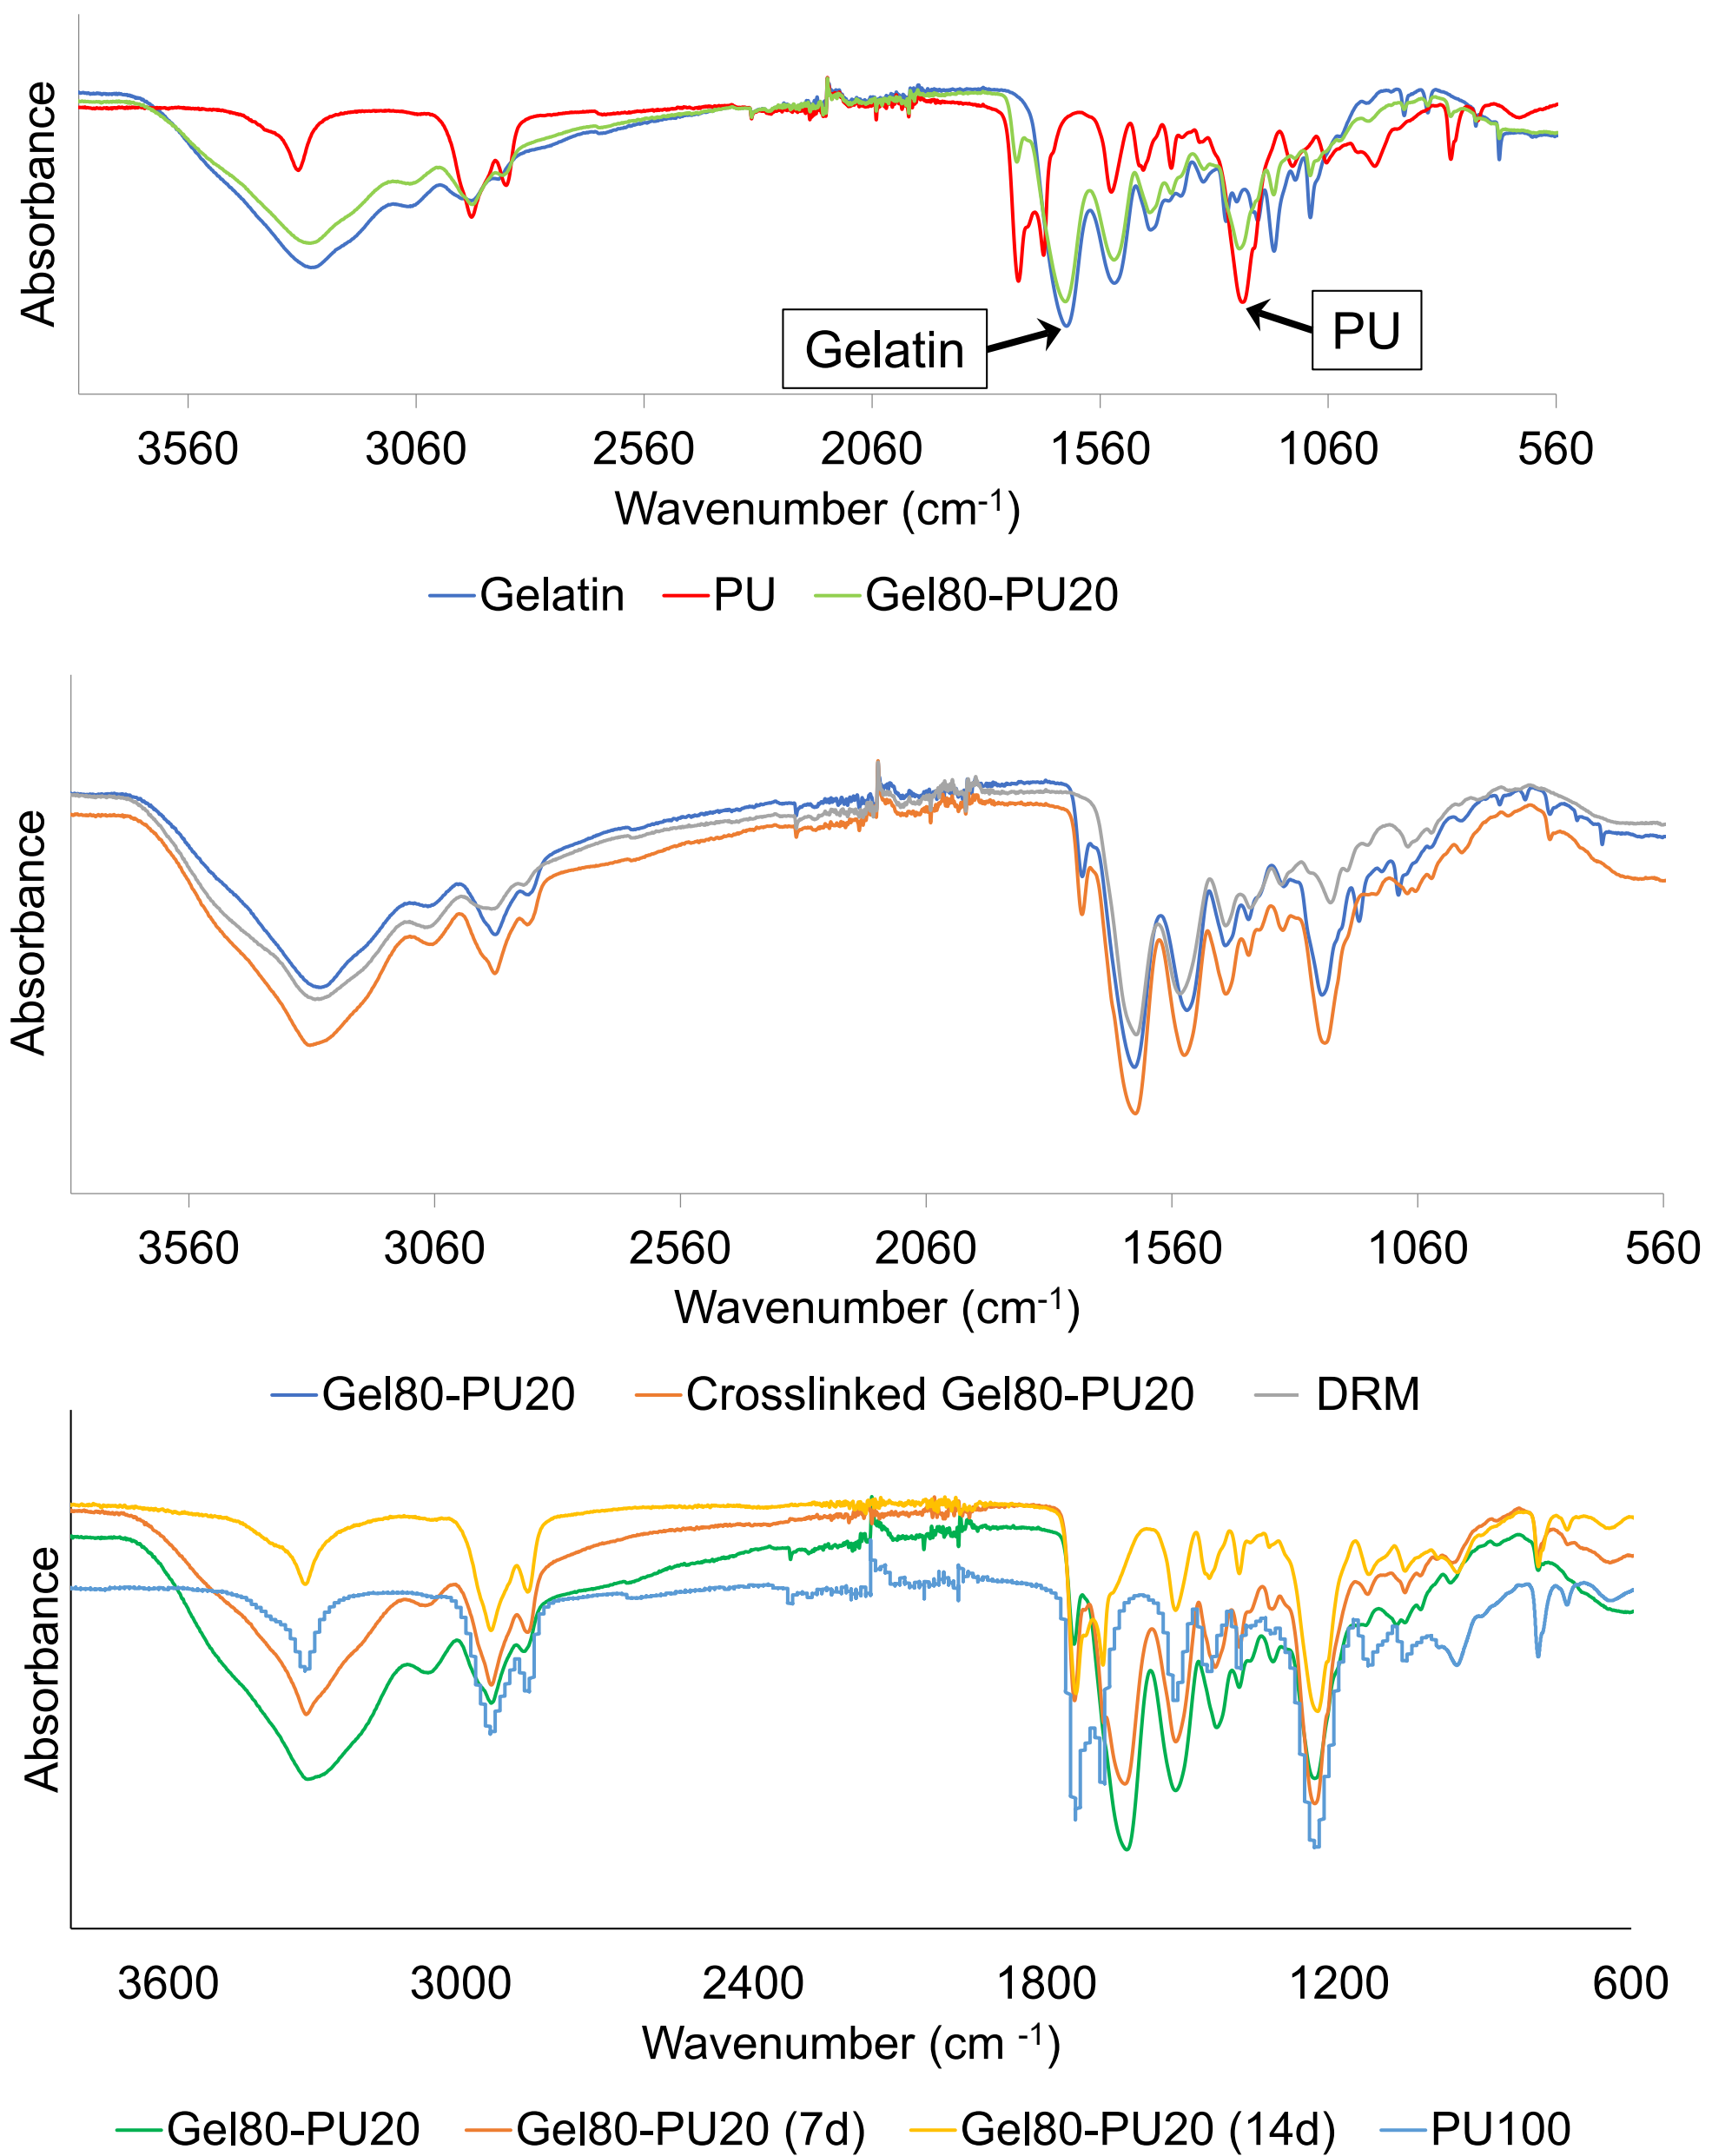

**S2:** ATR-FTIR spectrum of scaffolds. Top and middle: as-spun and crosslinked scaffolds. Bottom: scaffolds after 7 and 14 days of collagenase degradation compared with before degradation test and intact PU100



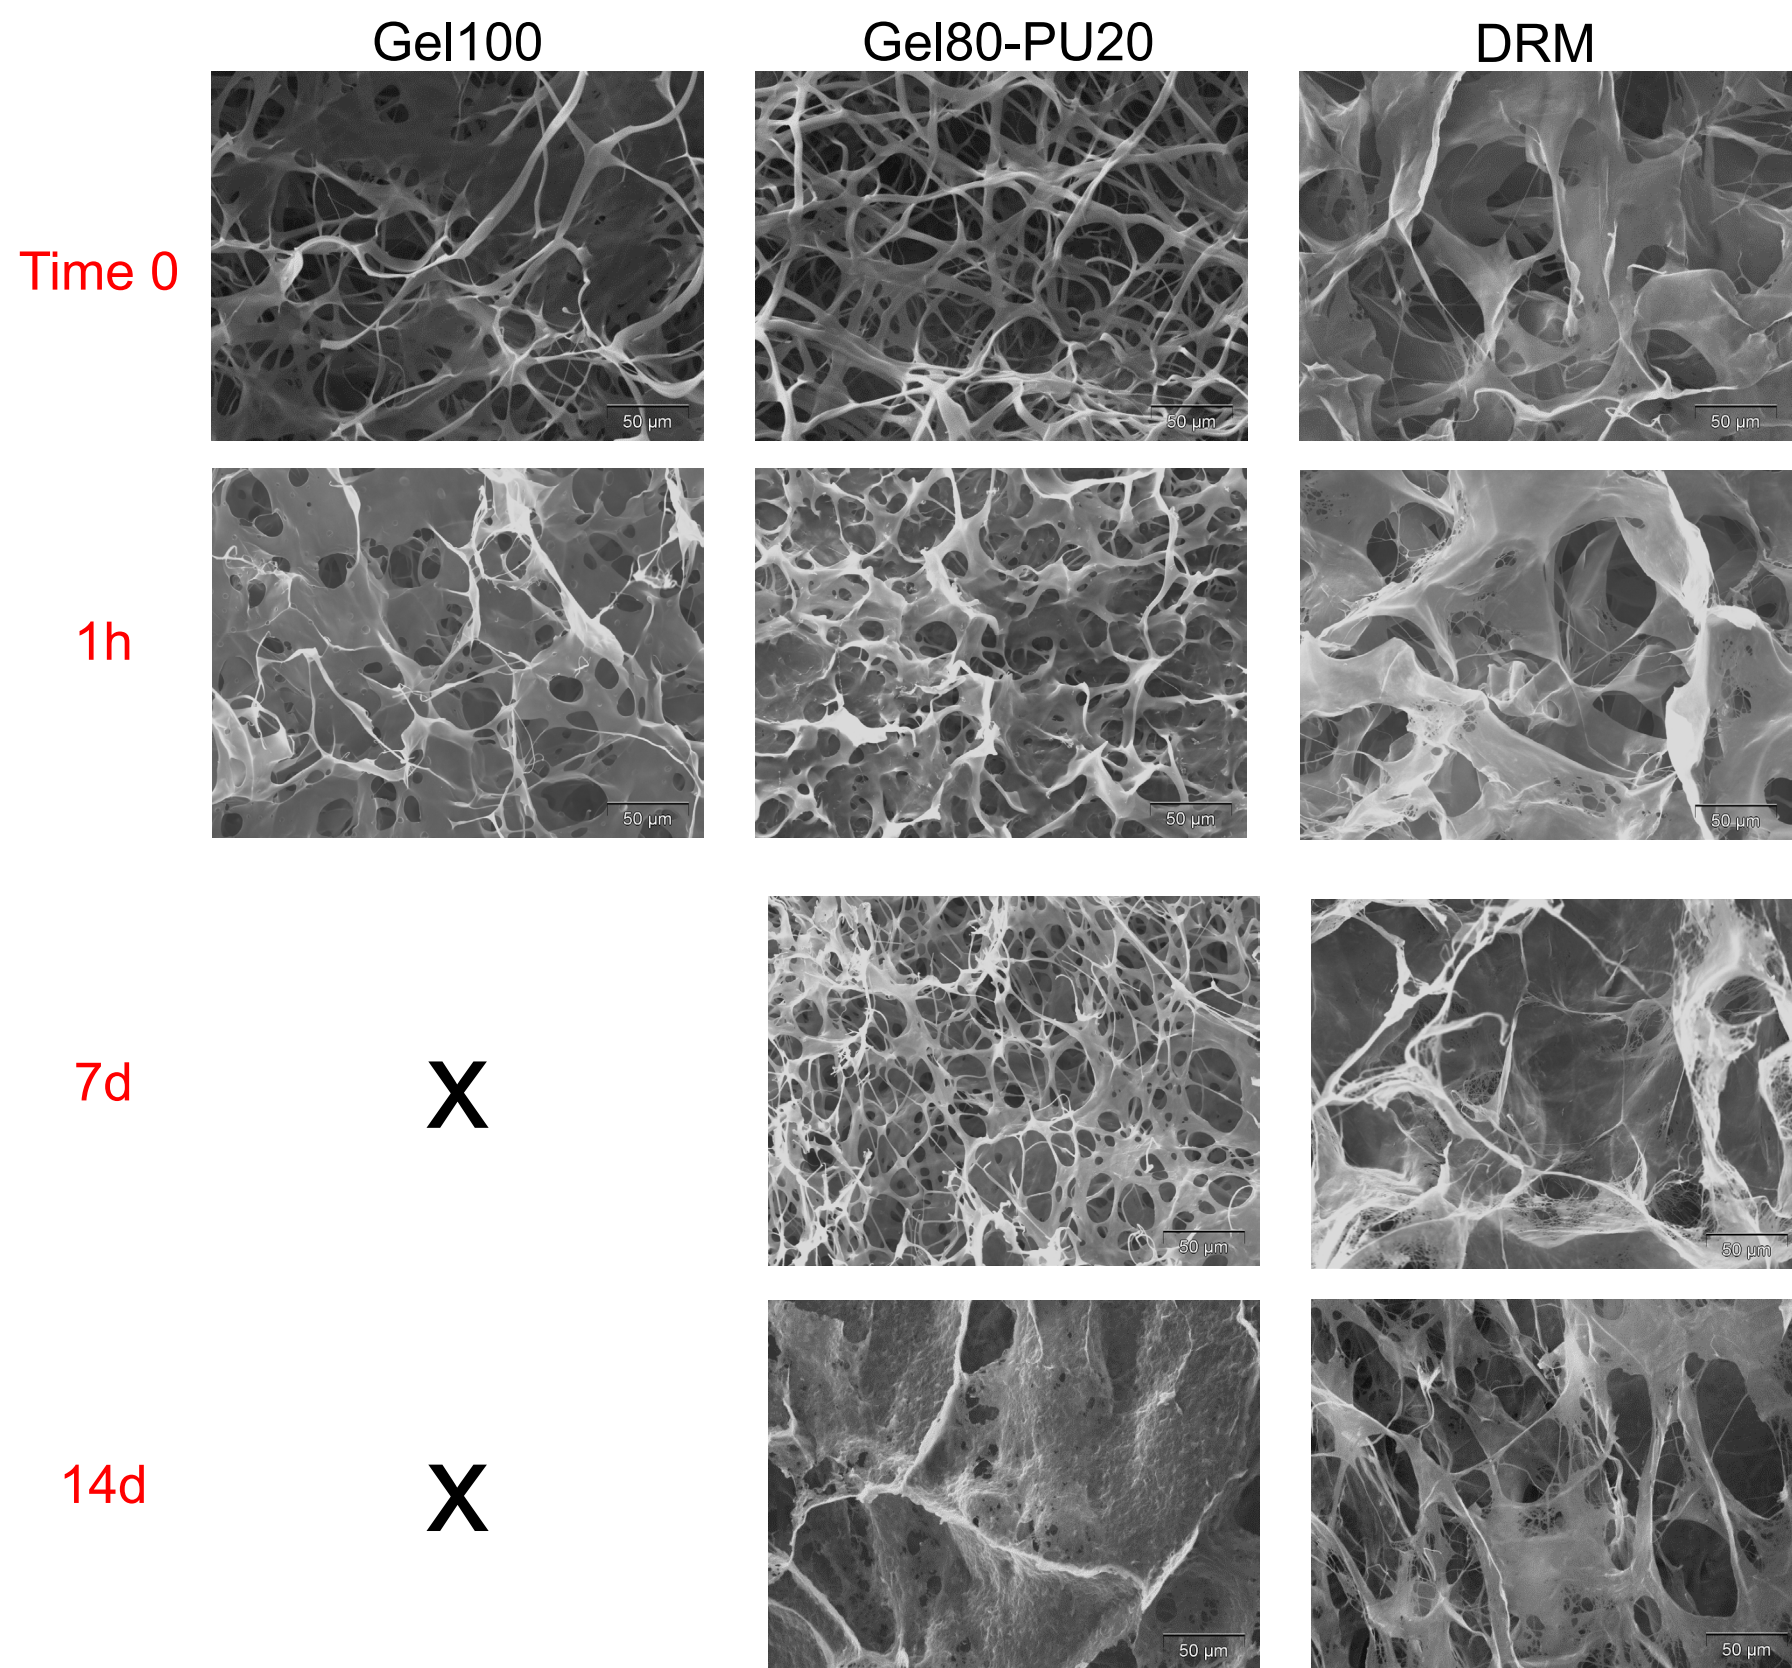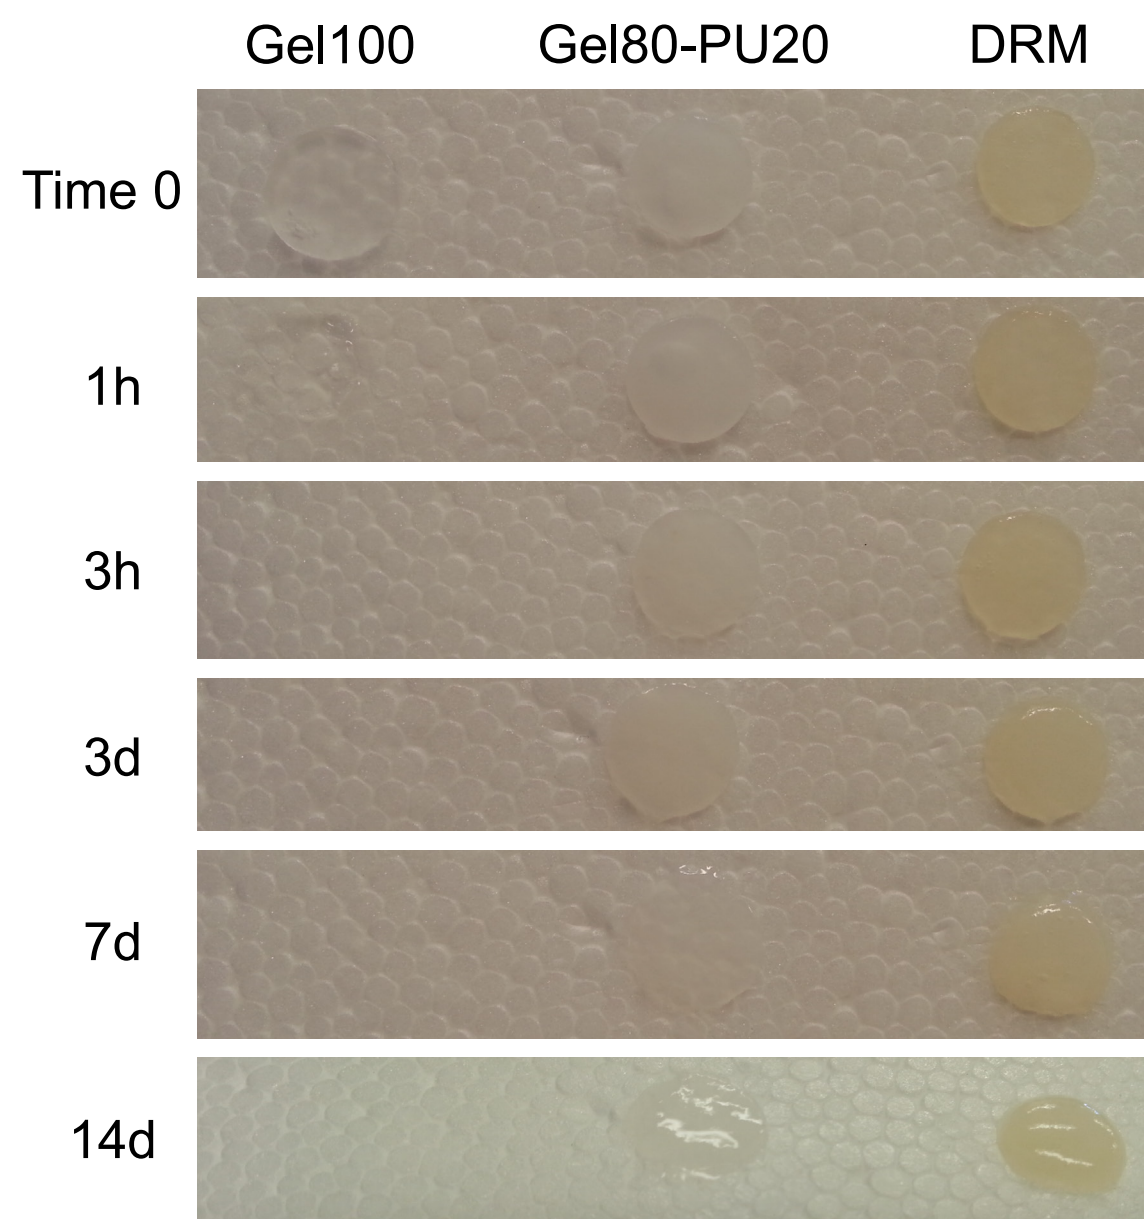

**S3:** SEM (top) and optical (bottom) images of the scaffolds after degradation assay



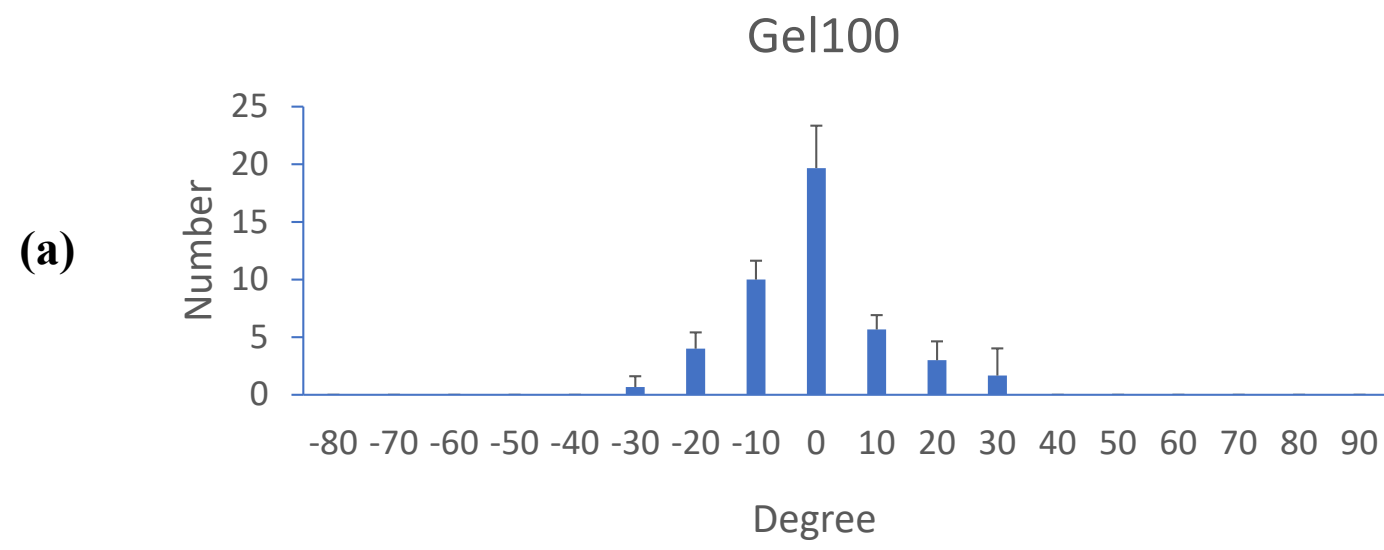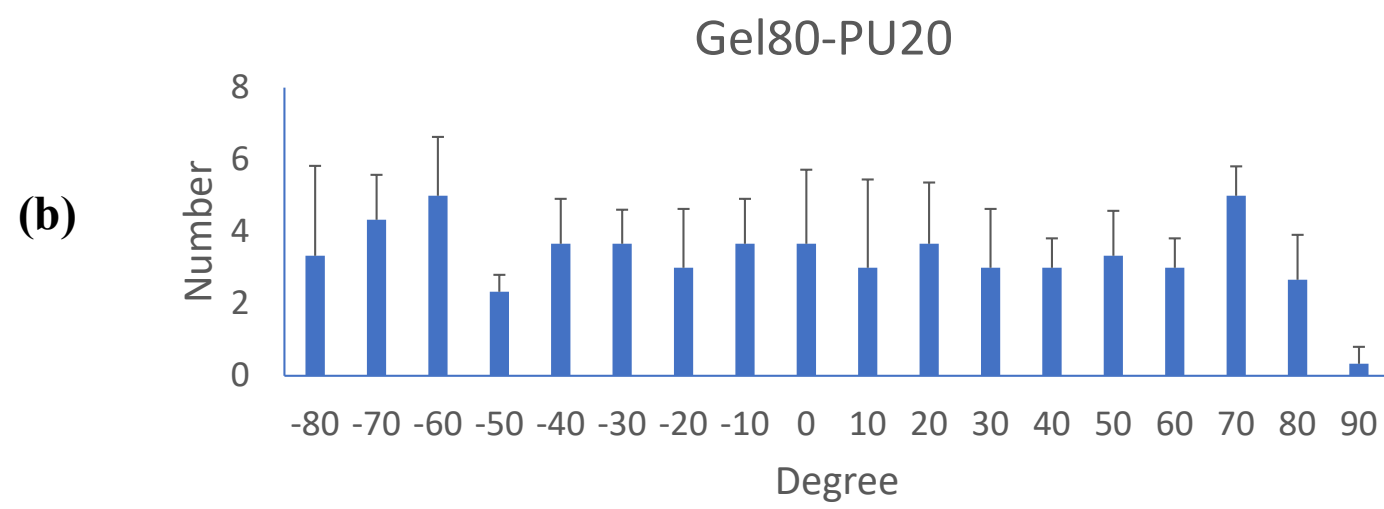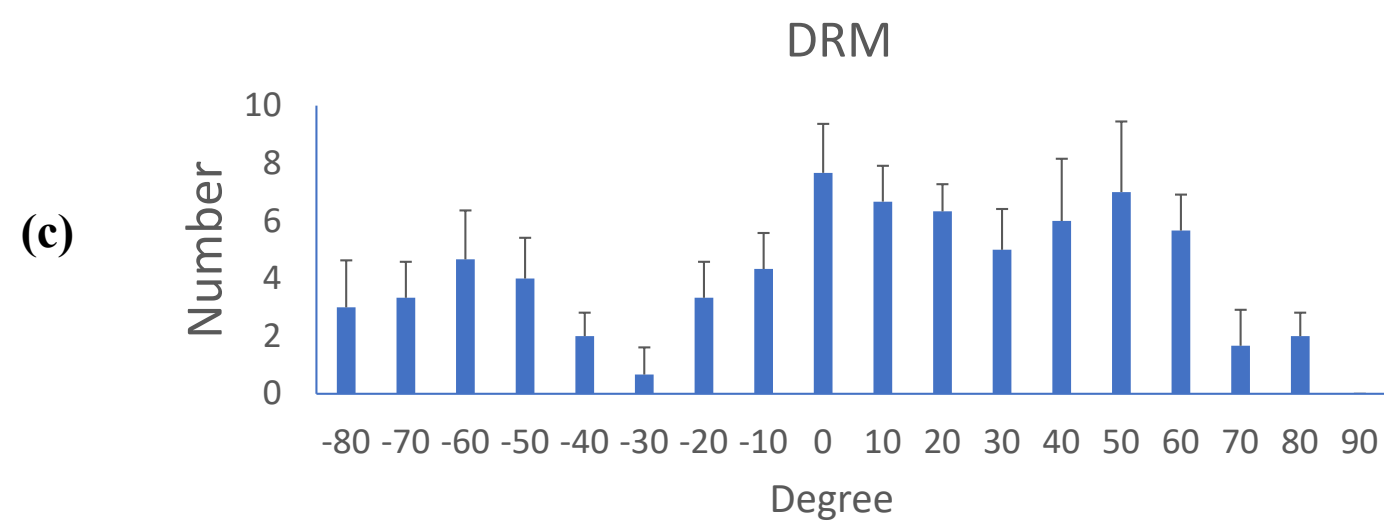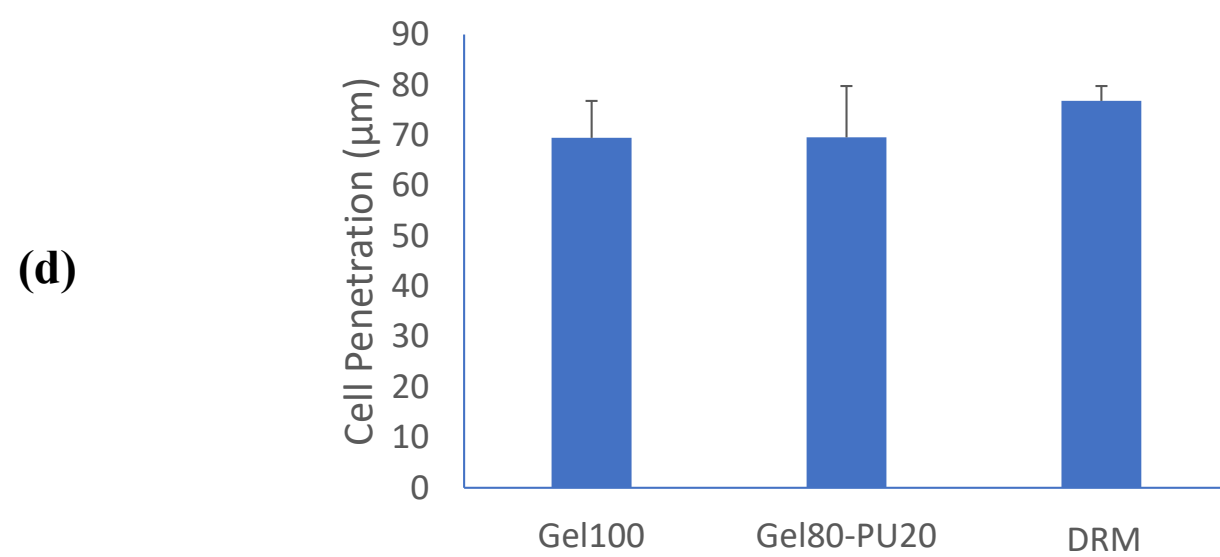

**S4: (a-c):** Quantification of HDF cell orientation on different scaffolds after 7 days. **(d):** Quantification of HDF cell penetration in different scaffolds after 7 days.

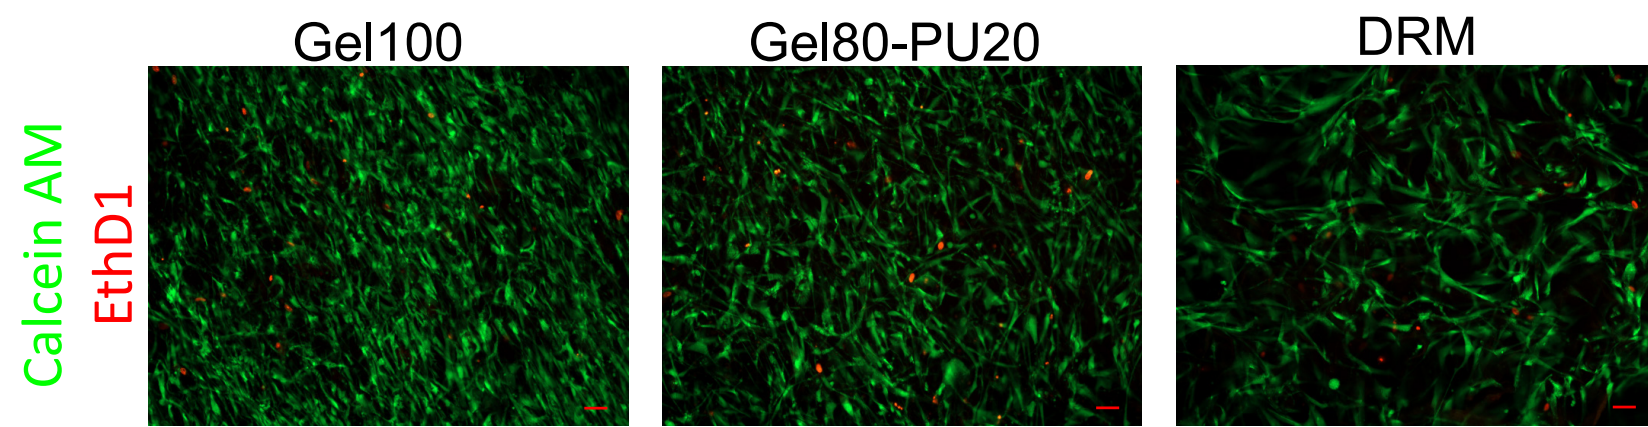

**S5:** Live-Dead staining of HDFs after 7 days culture on the scaffolds. Scale bar: 100  $\mu\text{m}$

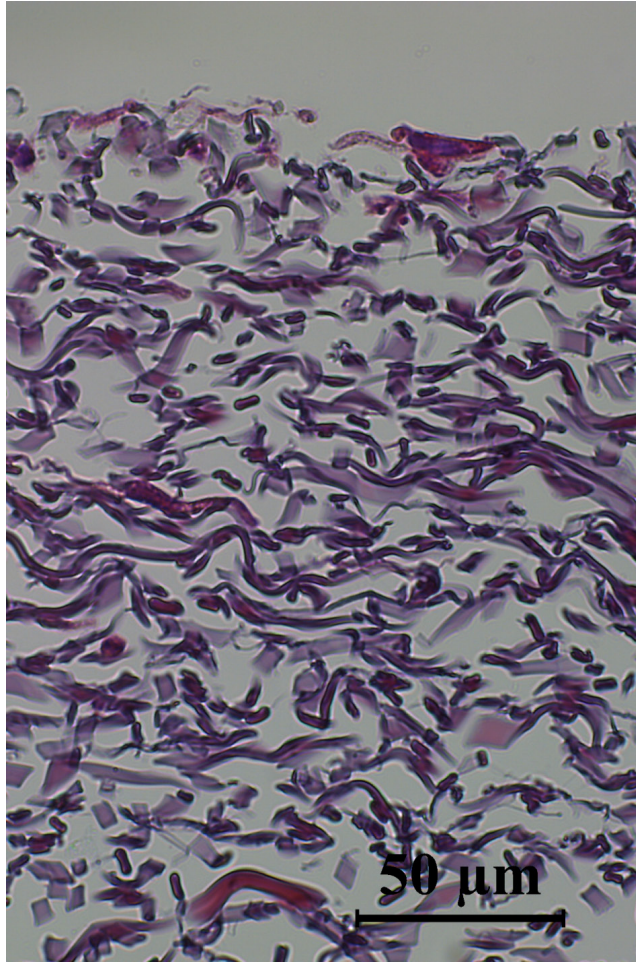

**S6:** Trichrome staining of the acellular Gel80-PU20 scaffold kept in cell culture media for 7 days. Scale bar: 50 μm.



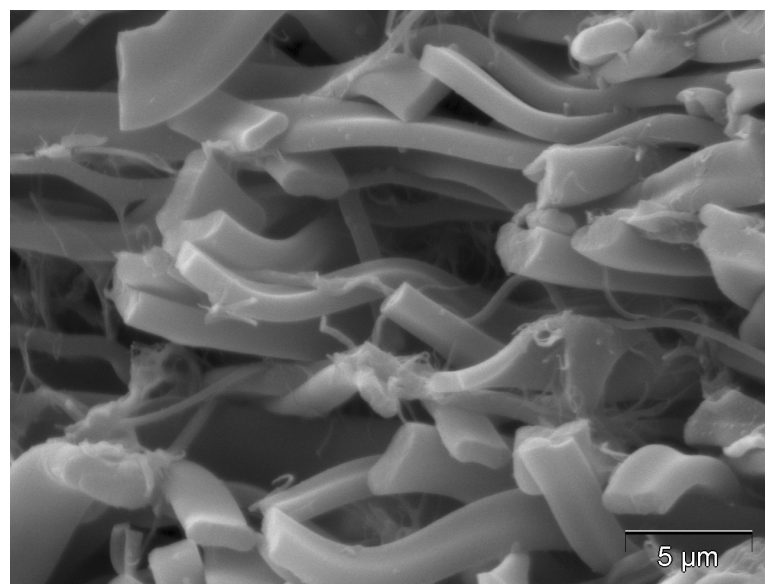

**S7:** SEM images of the cross section of an electrospun Gel180-PU20 membrane obtained after snap-freezing, breaking and drying. Scale bar: 5  $\mu\text{m}$ .

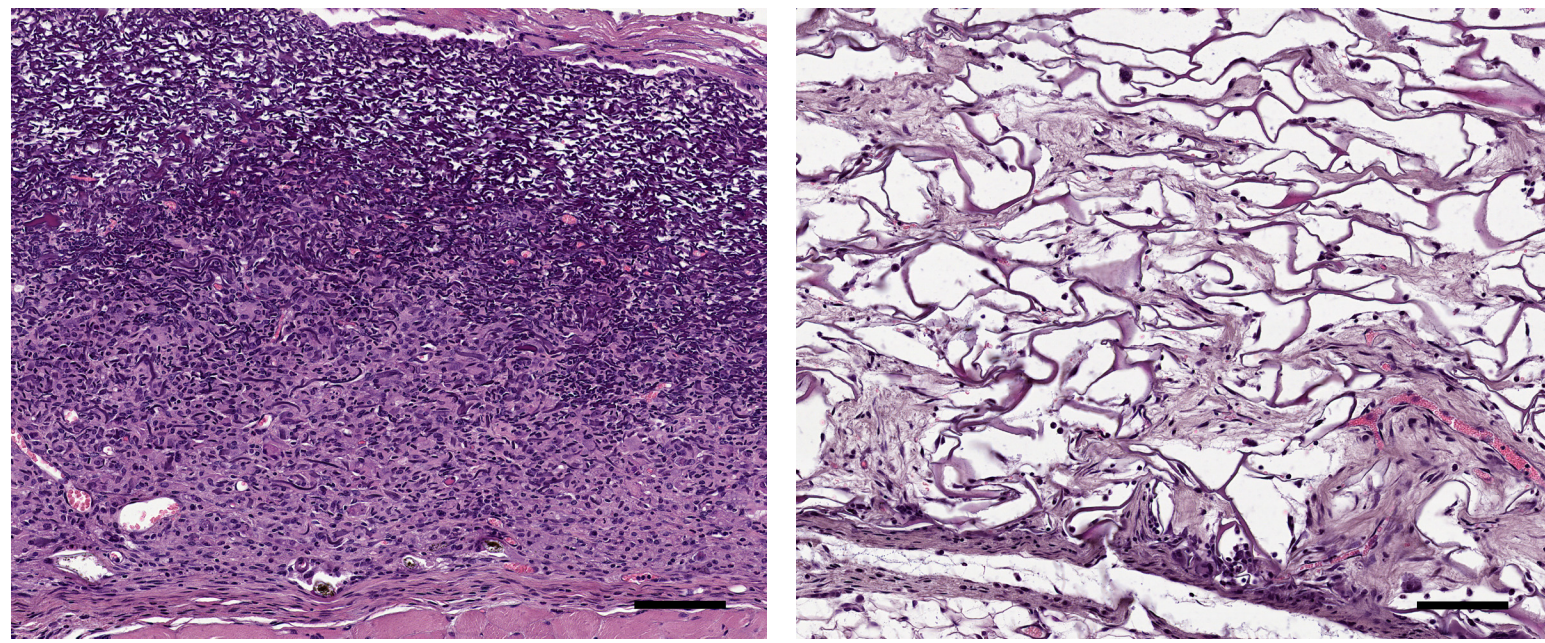

(a)

(b)

**S8:** H&E staining of acellular (a): electrospun Gel80-PU20 membranes and (b): DRM, after implantation on mice for 20 days. Scale bar: 100  $\mu$ m.



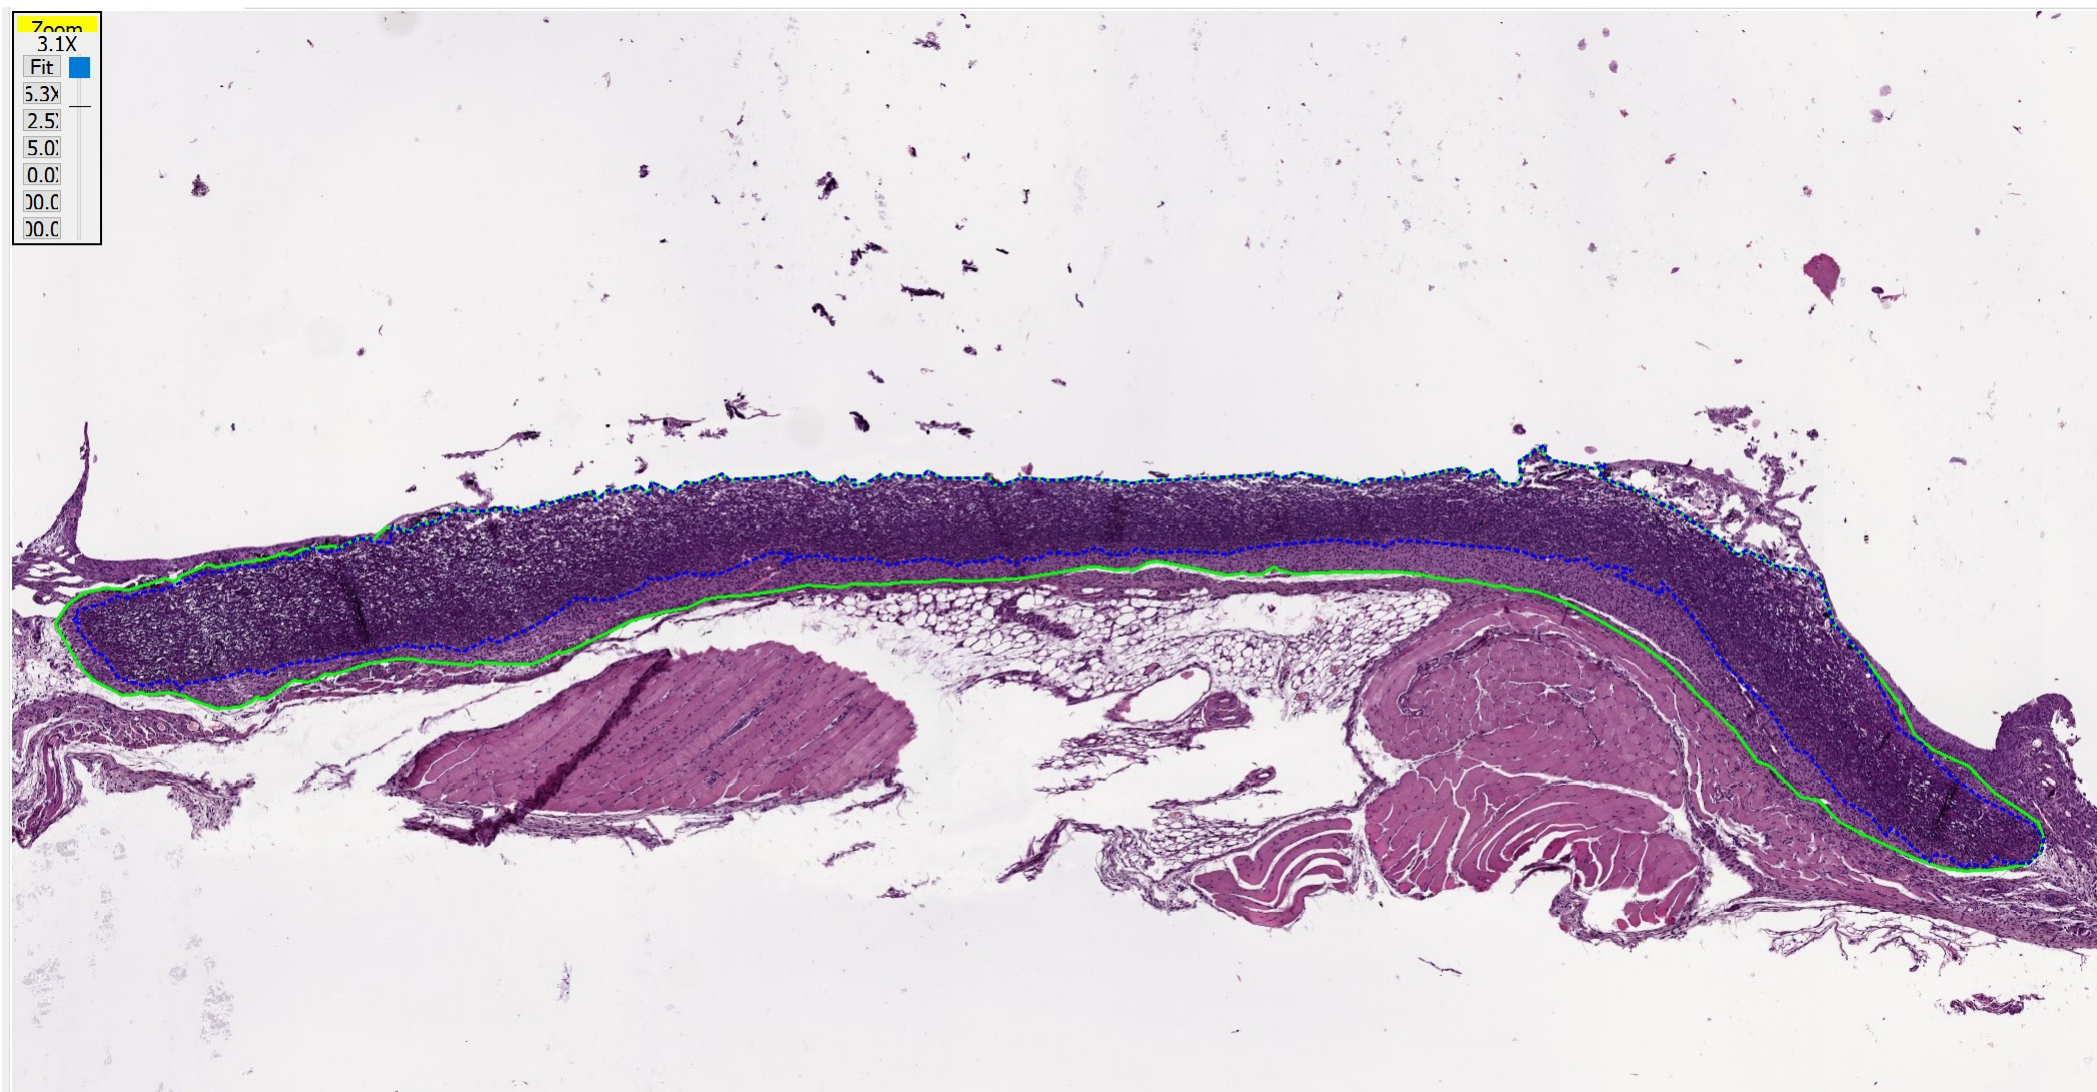

(a)

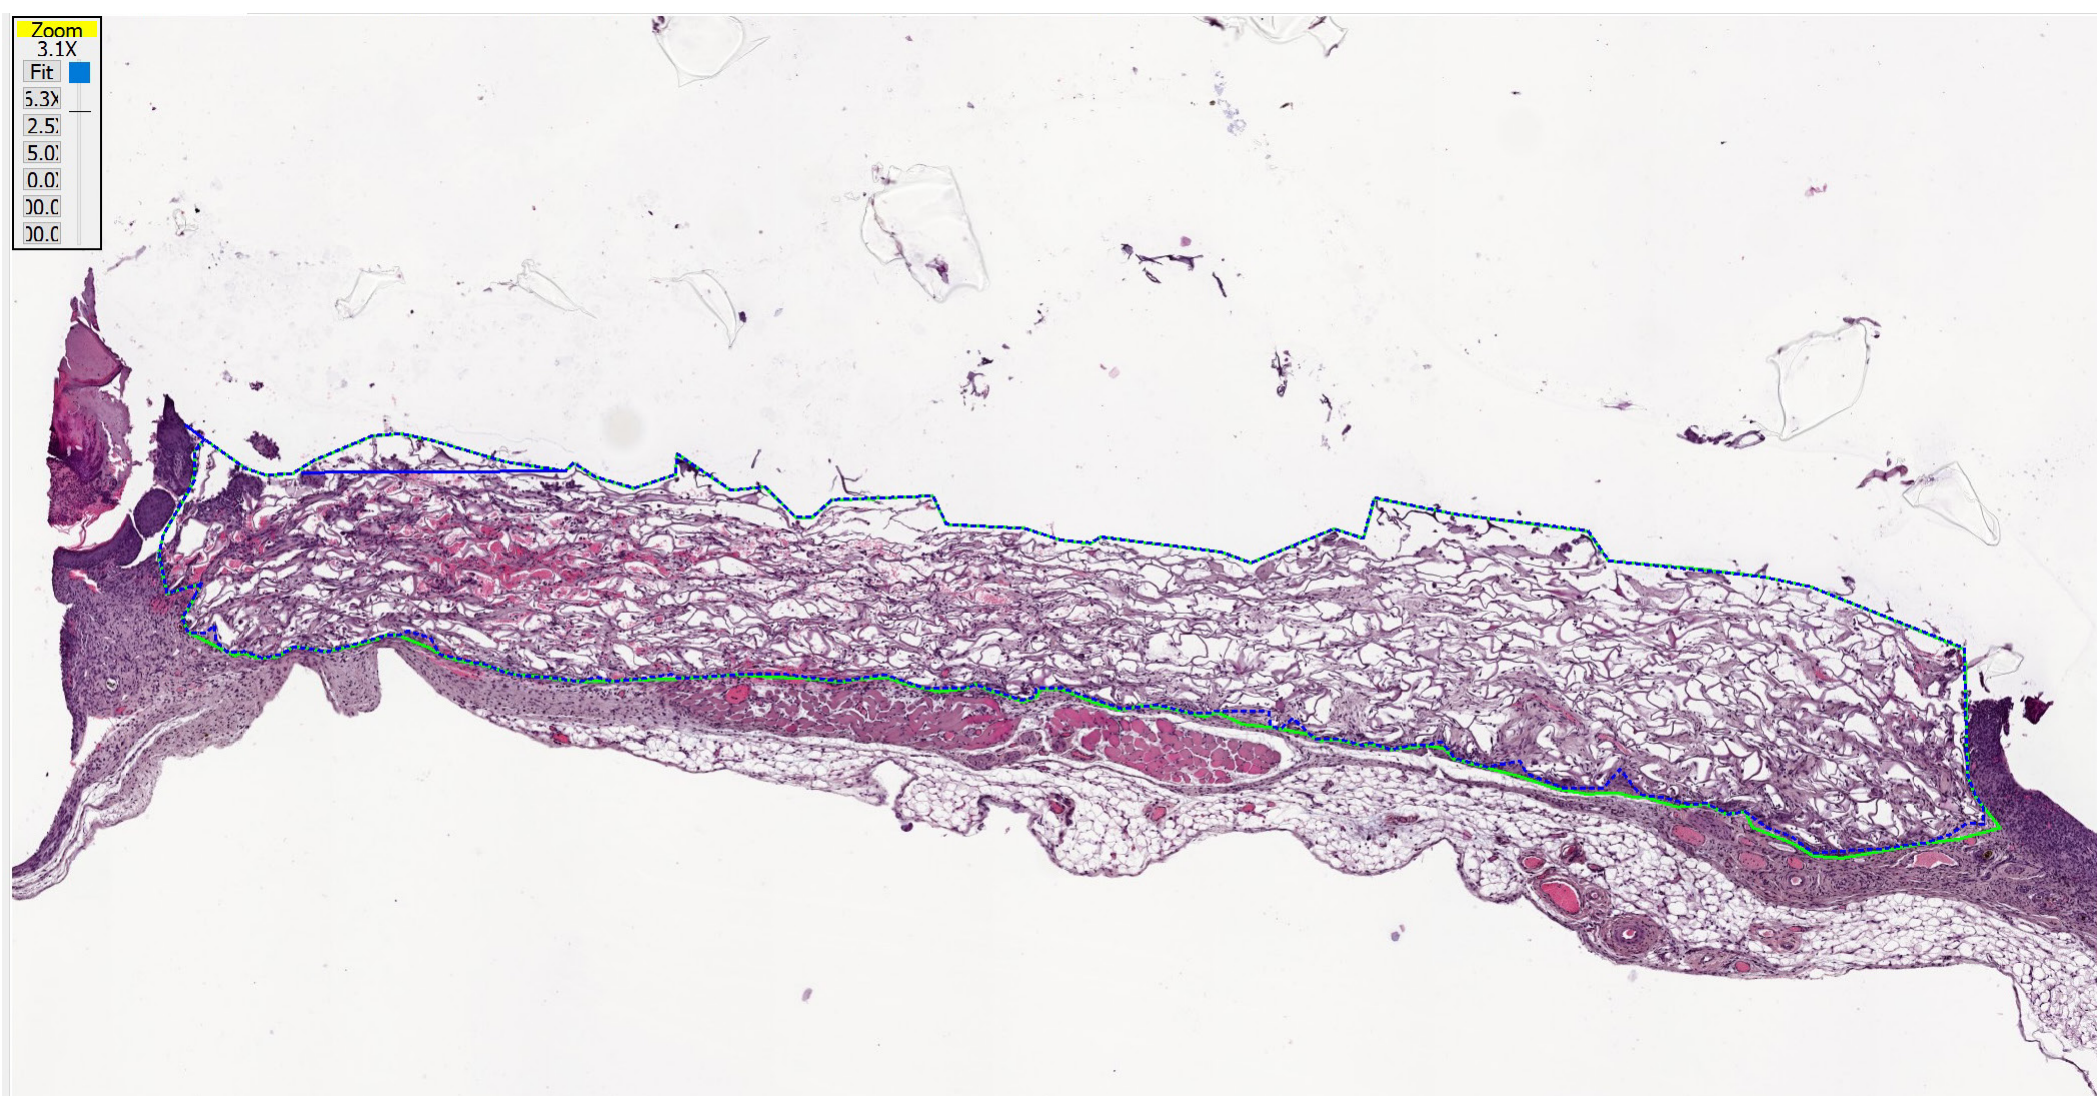

(b)

**S9:** %Degradation measurement in vivo. H&E staining of (a): electrospun Gel80-PU20 membranes and (b): DRM, after implantation on mice for 20 days. The green line encloses the initial scaffold area and the dashed blue line surrounds the residual scaffold after 20 days.



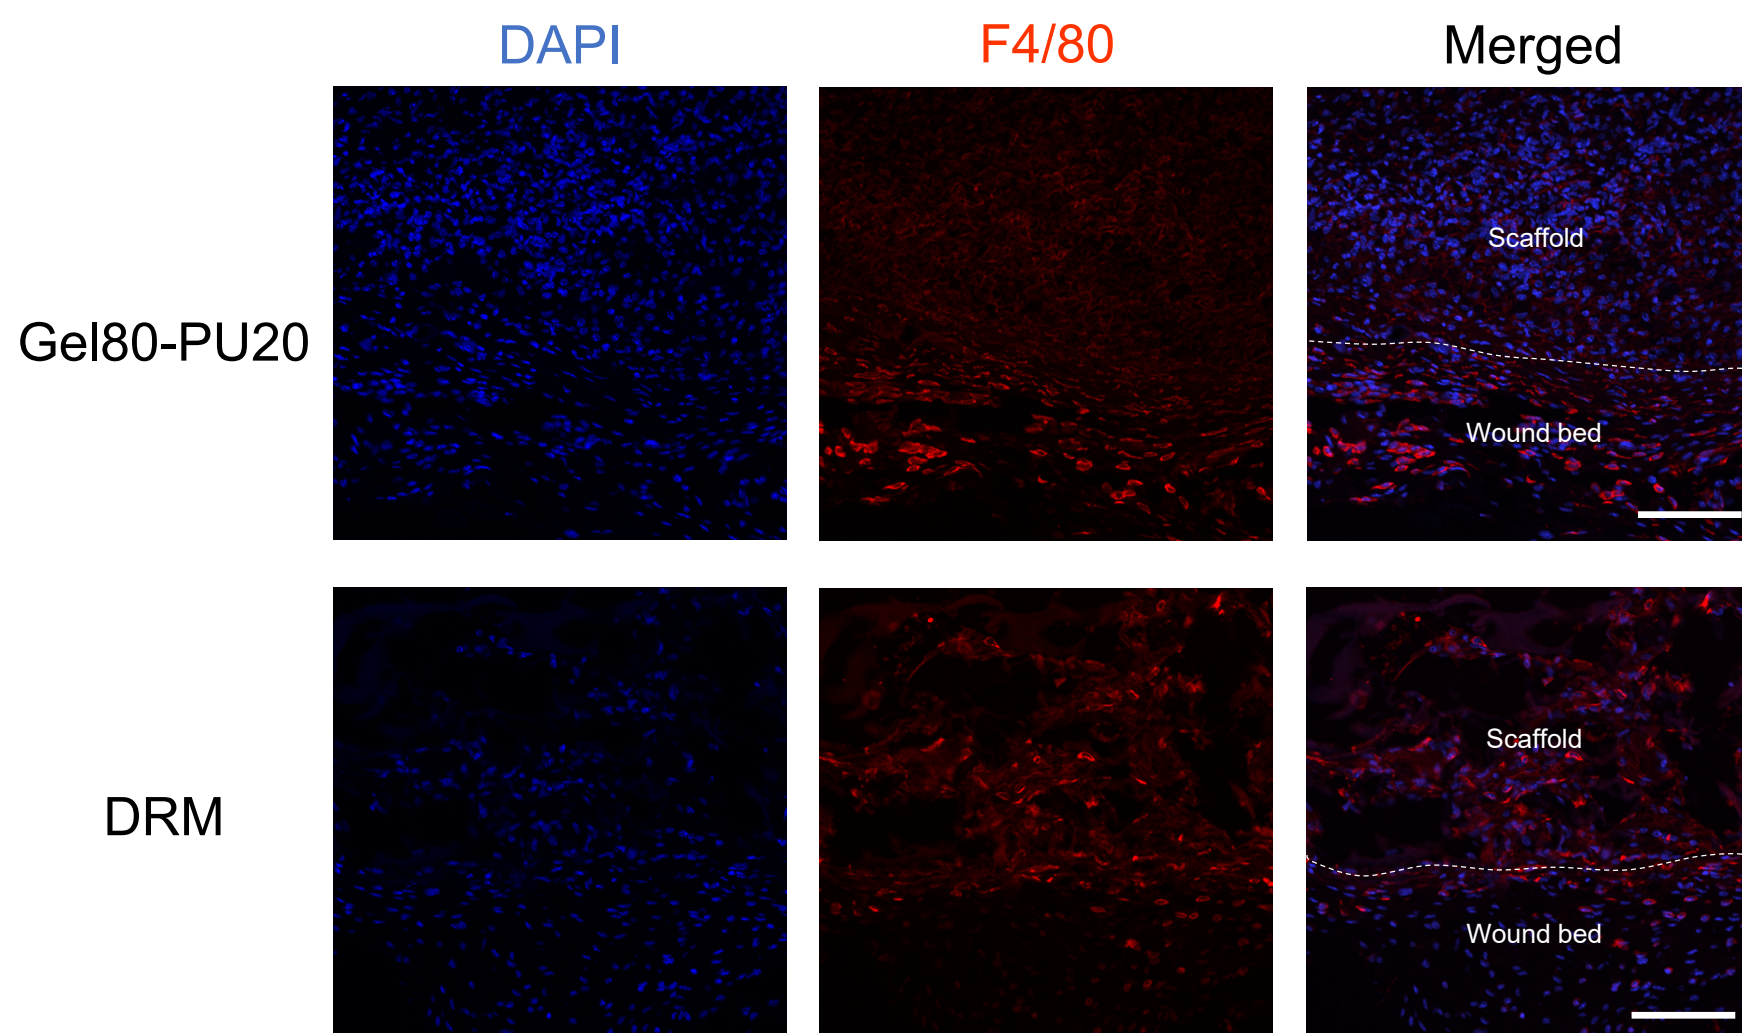

**S10:** F4/80 immunostaining for macrophages on the scaffolds after 20 days on the mice wound. Scale bar: 100  $\mu$ m.



**GeI80-PU20**

**F4/80**

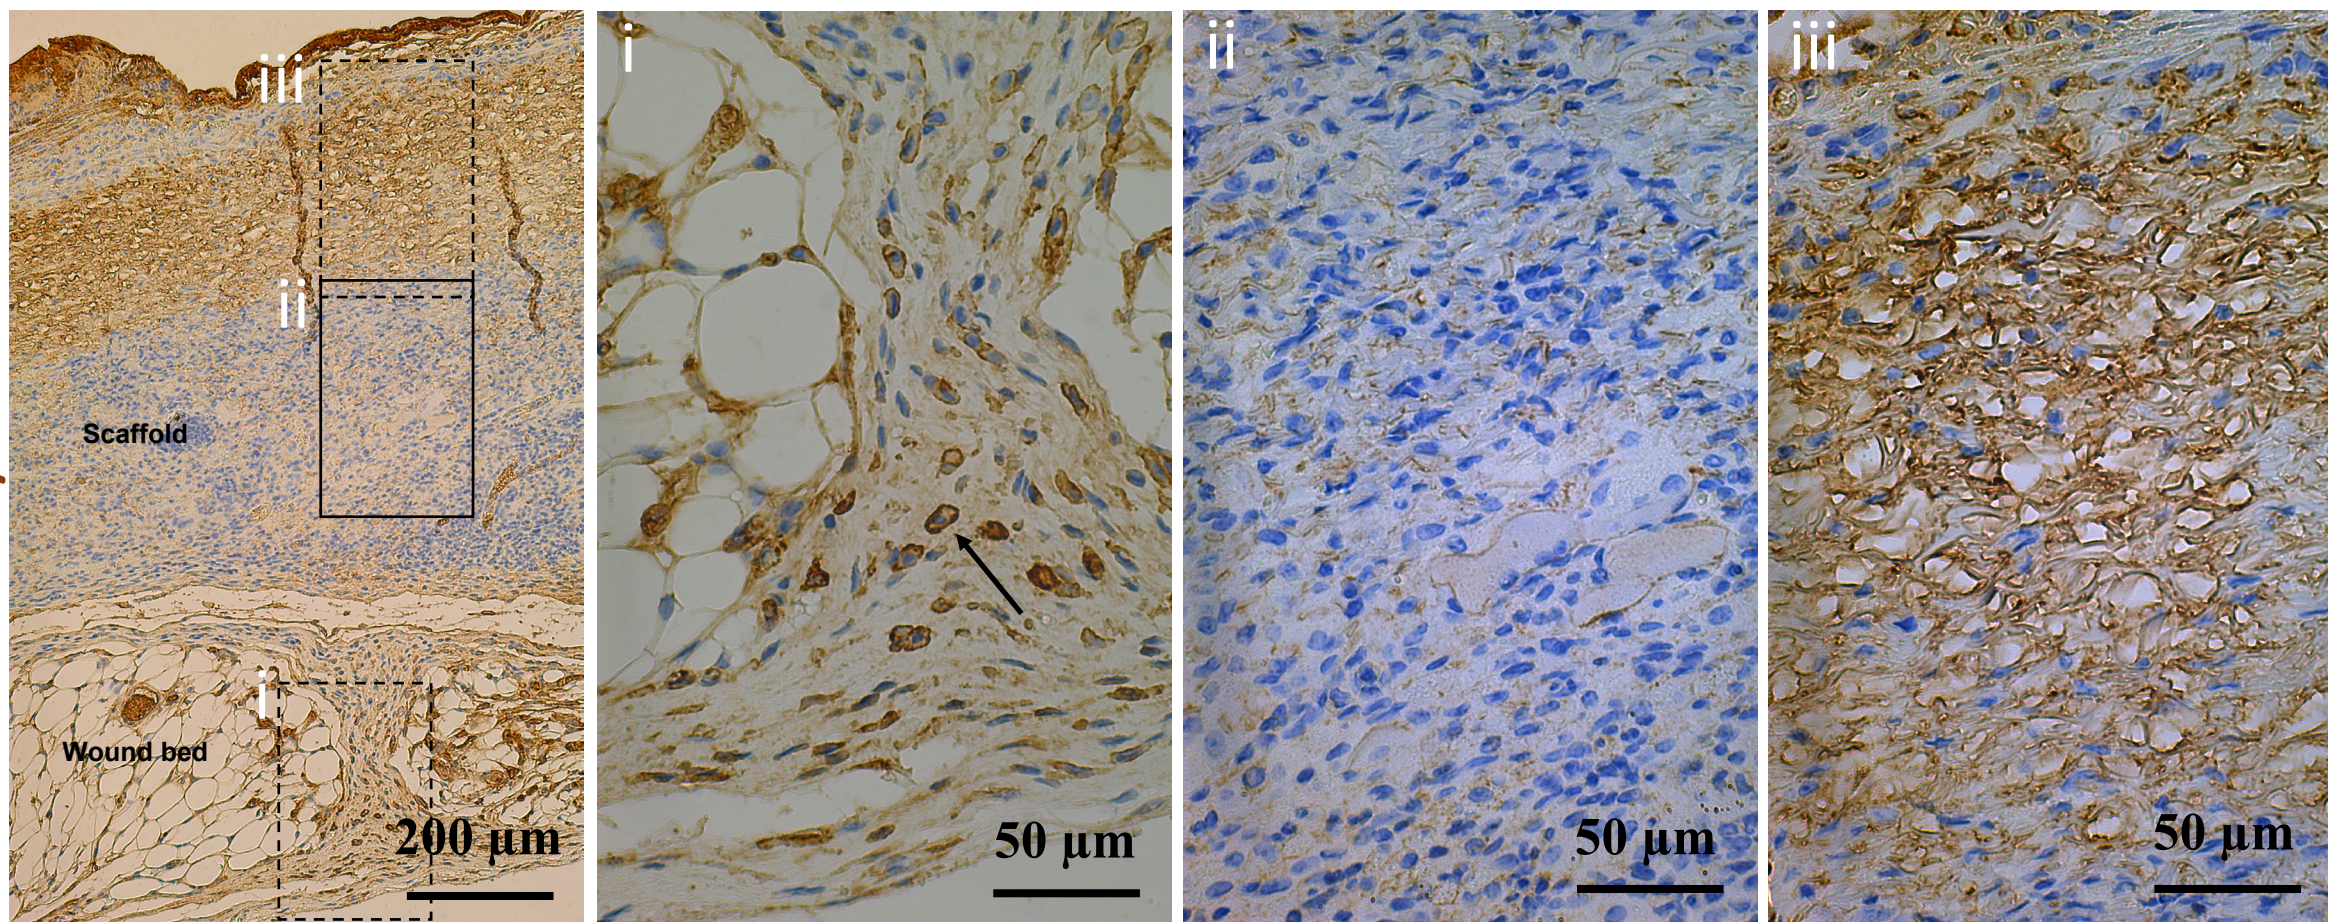

**DRM**

**F4/80**

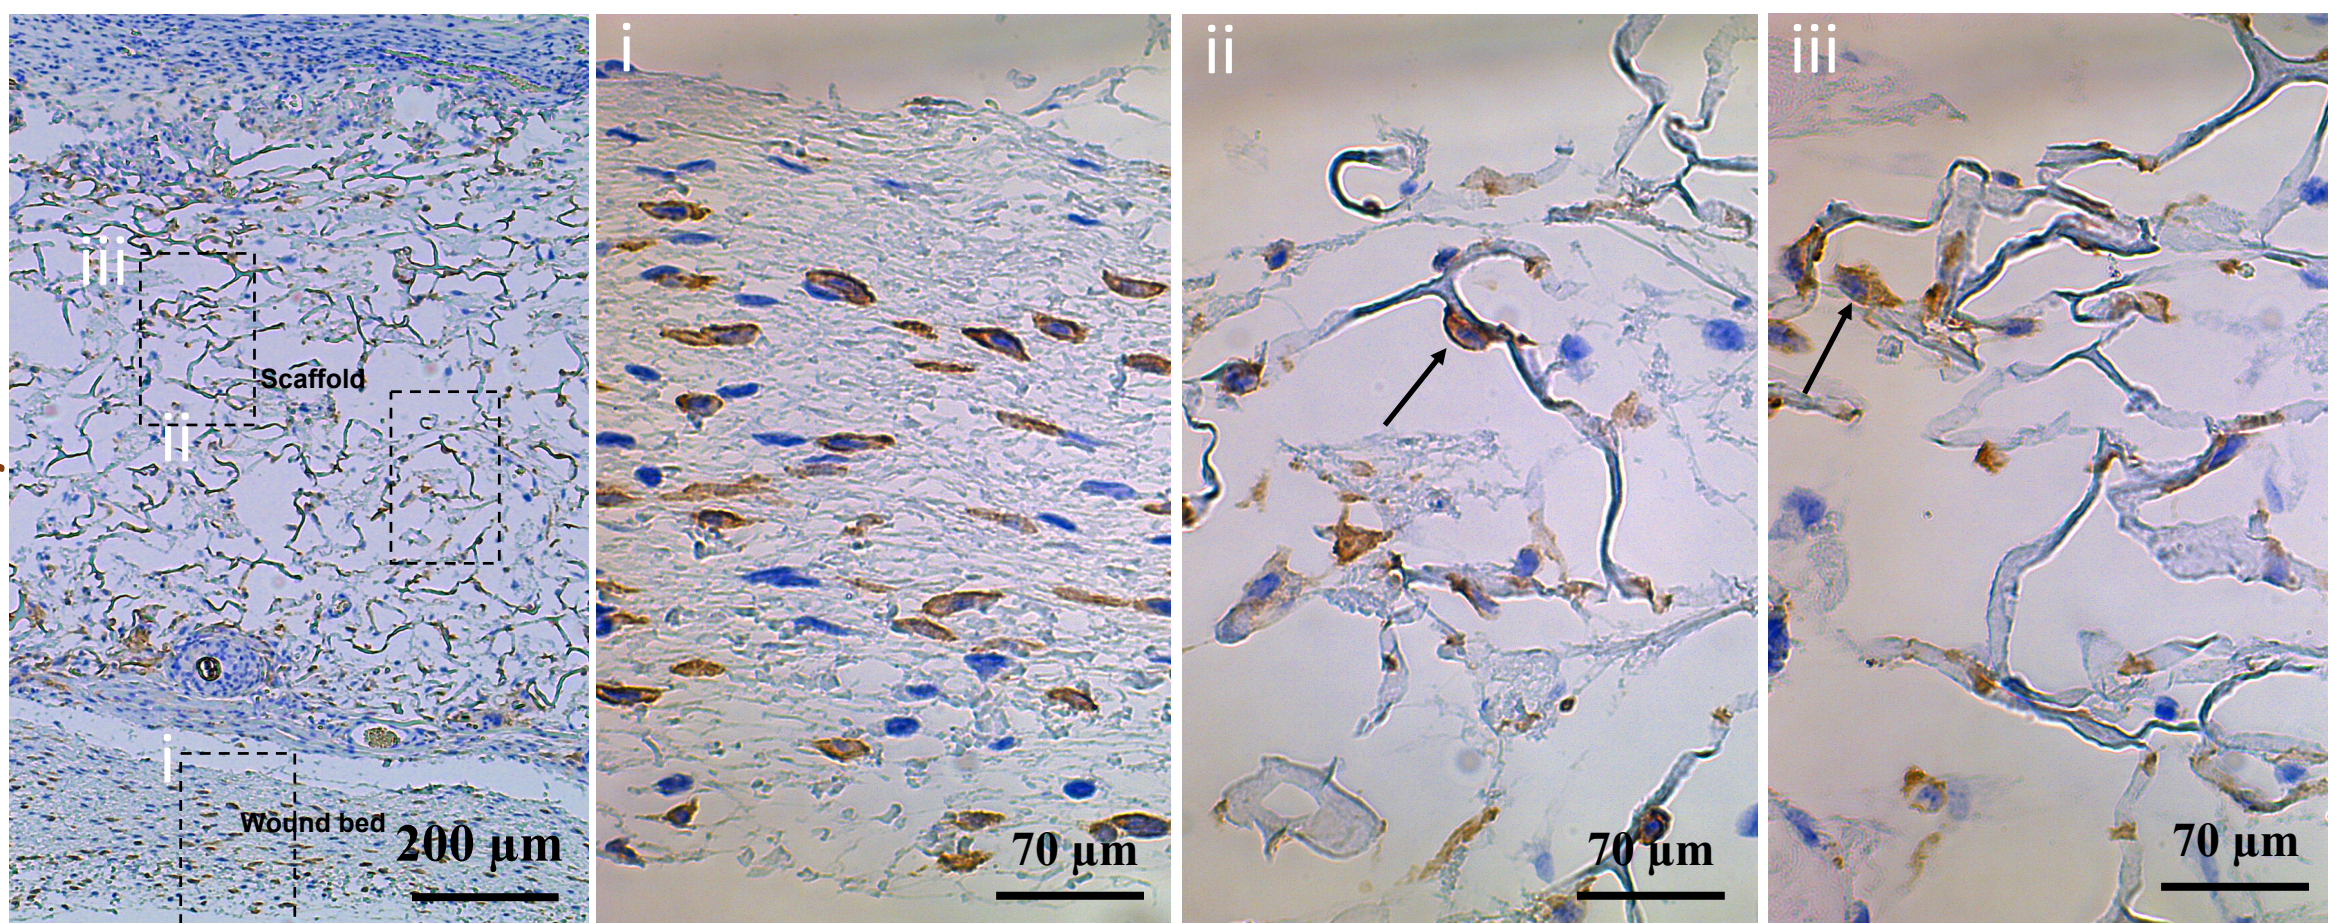

**S11:** IHC for macrophages (F4/80+ cells) on the scaffolds.



No scaffold

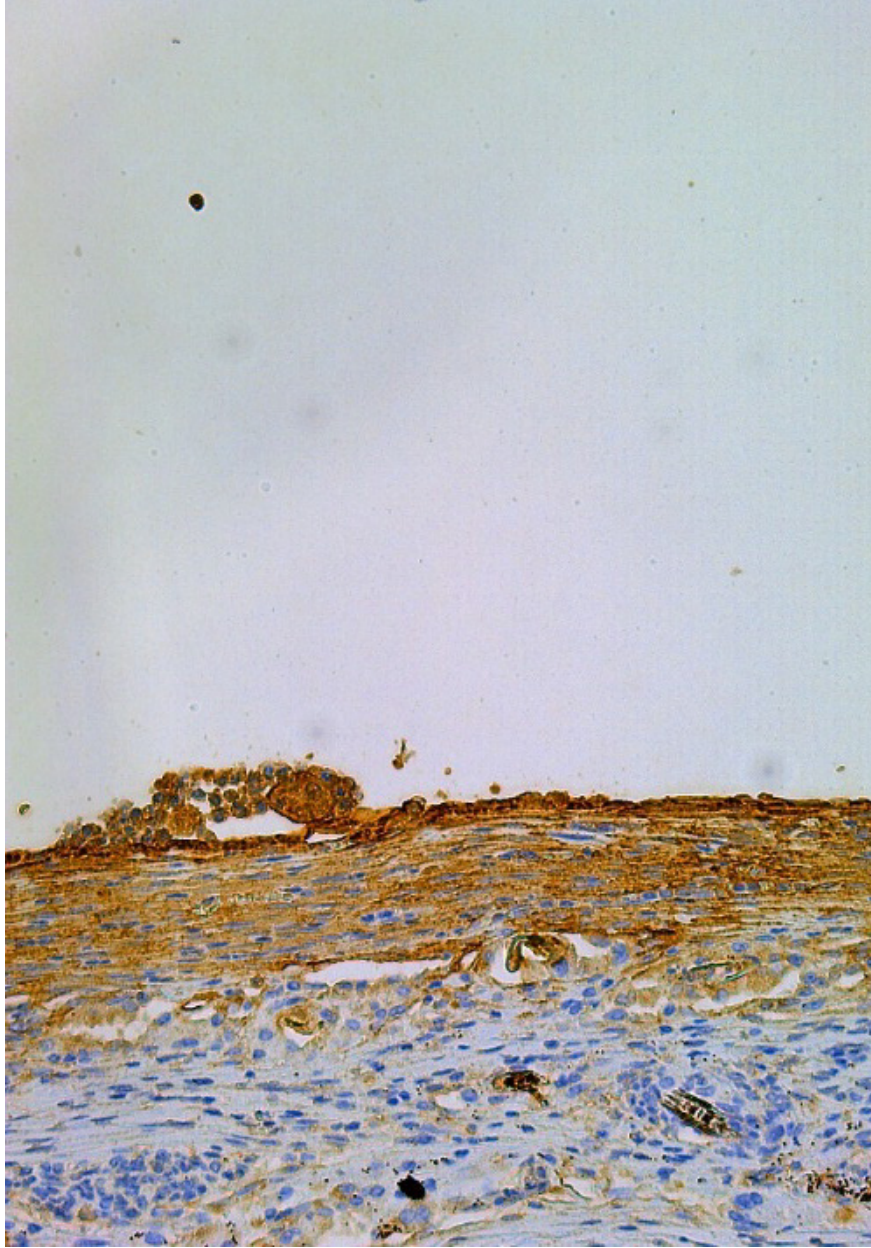

Gel80-PU20

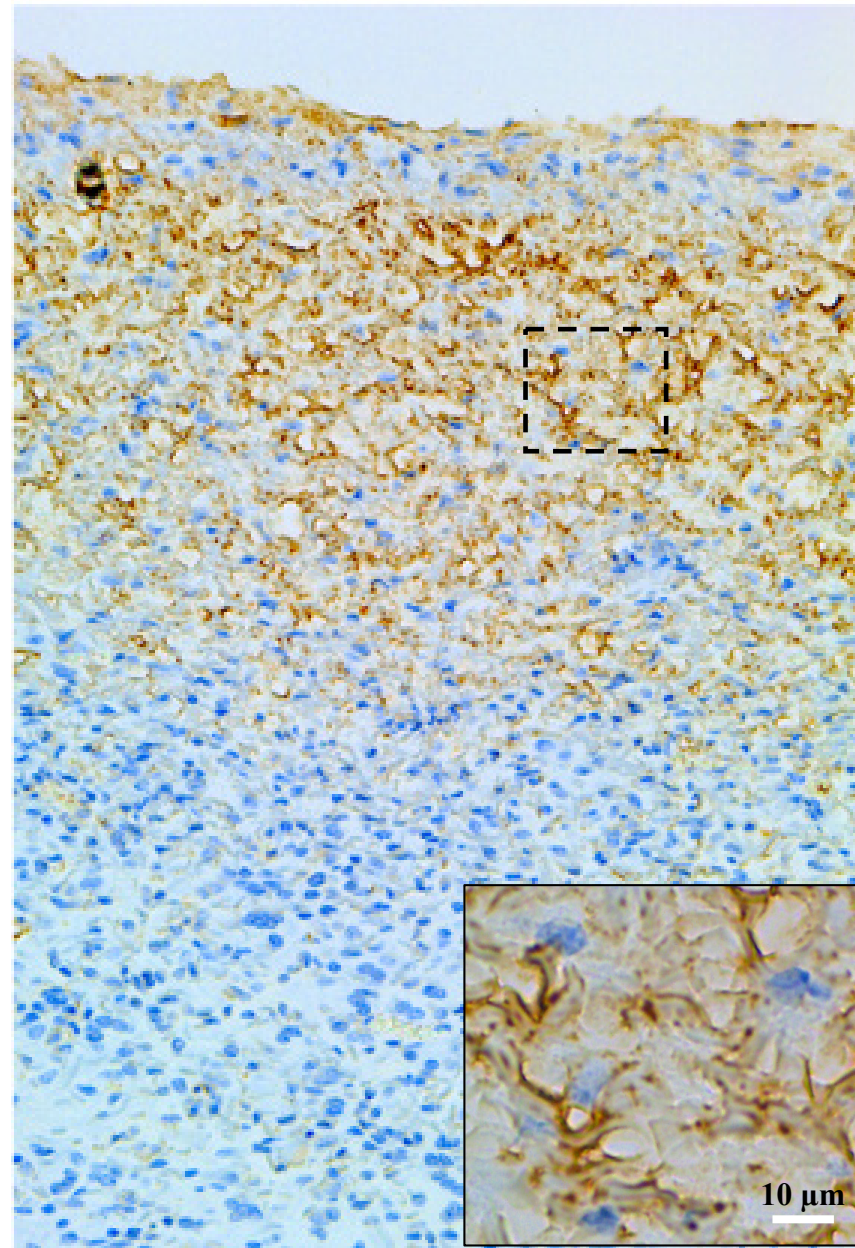

**S12:** Role of presence of scaffold in decreasing  $\alpha$ SMA:  
IHC for myofibroblasts ( $\alpha$ SMA+ cells) on the wound without any scaffold and a wound covered with Gel80-PU20. Inset in Gel80-PU20 shows higher magnification image of the selected area.



Gel80-PU20

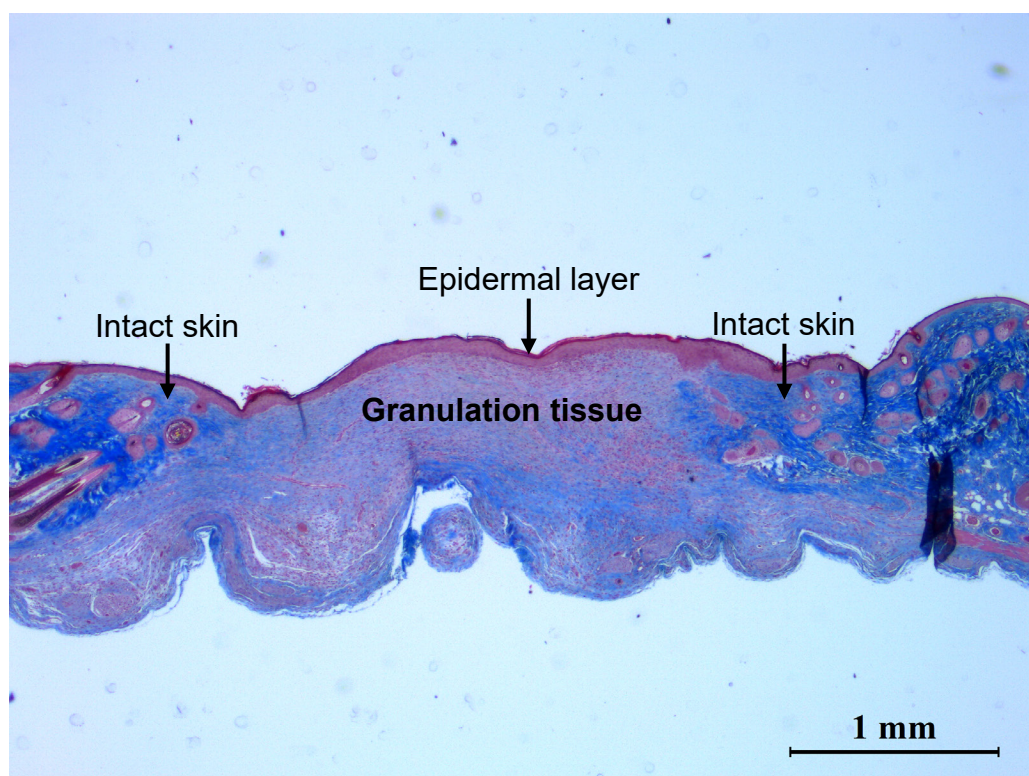

DRM

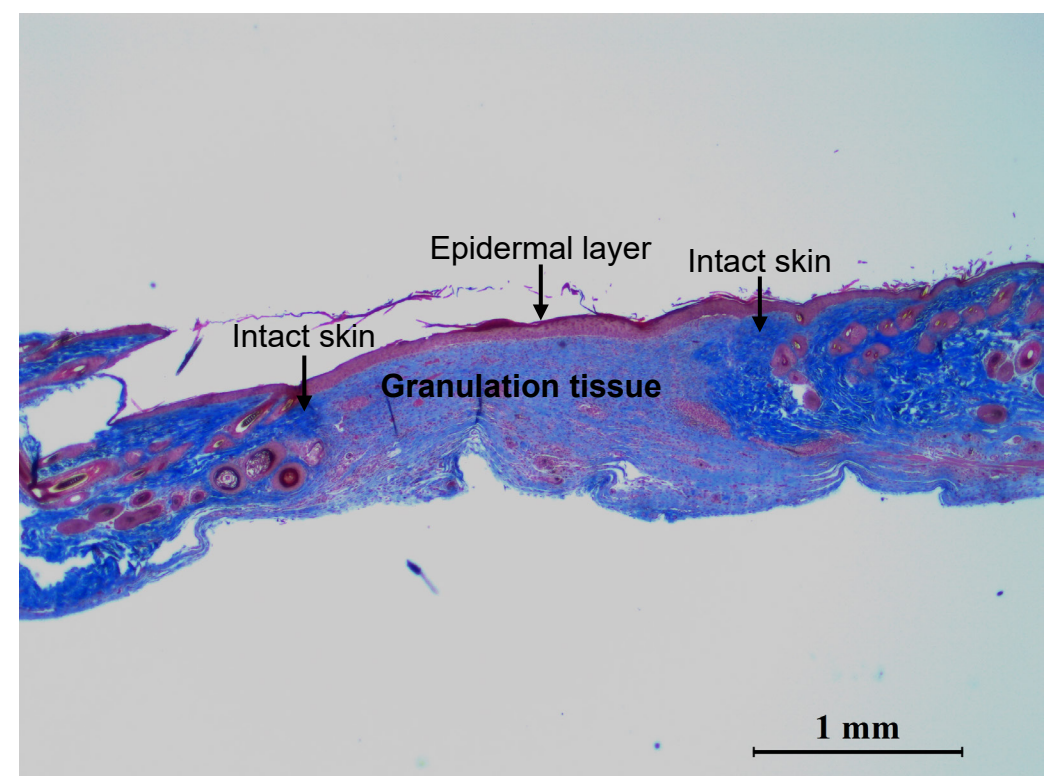

**S13:** Trichrome staining of mice wounds closed in presence of scaffolds after 14 days without using of a dome.
